# Supplementary material for: Descriptor–property relationships in heterogeneous catalysis: exploiting synergies between statistics and fundamental kinetic modelling
Source: Royal Society of Chemistry journal article supplement (doi:10.1039/c9cy00719a), 2019-01-01
Supplement: c9cy00719a1.pdf [file c9cy00719a1.pdf]

# Descriptor - property relationships in heterogeneous catalysis: exploiting synergies between statistics and fundamental kinetic modelling

## Supporting Information

*Laura Pirro<sup>†</sup>, Pedro S. F. Mendes<sup>†</sup>, Stijn Paret<sup>†</sup>, Bart D. Vandegehuchte<sup>‡</sup>, Guy B. Marin<sup>†</sup>,  
Joris W. Thybaut<sup>†,\*</sup>*

<sup>†</sup> Laboratory for Chemical Technology, Ghent University, Technologiepark 125, B-9052 Ghent, Belgium

<sup>‡</sup> Total Research & Technology Feluy, Zone Industrielle Feluy C B-7181, Seneffe, Belgium

\*joris.thybaut@ugent.be

## S1. OCM fundamental kinetic model and catalyst descriptor summary

Table S1: Gas-phase reaction network; kinetic parameters are reported by Chen et al.<sup>1</sup>

|                                                                                                              |                                                                                                                           |
|--------------------------------------------------------------------------------------------------------------|---------------------------------------------------------------------------------------------------------------------------|
| <b>Primary initiation</b>                                                                                    | <b>Dehydrogenation of C<sub>2</sub>-C<sub>3</sub></b>                                                                     |
| $\text{CH}_4 + \text{O}_2 \rightleftharpoons \text{CH}_3\cdot + \text{HO}_2\cdot$                            | $\text{C}_2\text{H}_6 + \text{H}\cdot \rightleftharpoons \text{C}_2\text{H}_5\cdot + \text{H}_2$                          |
| <b>CH<sub>3</sub>• generation</b>                                                                            | $\text{C}_2\text{H}_6 + \text{OH}\cdot \rightleftharpoons \text{C}_2\text{H}_5\cdot + \text{H}_2\text{O}$                 |
| $\text{CH}_4 + \text{H}\cdot \rightleftharpoons \text{CH}_3\cdot + \text{H}_2$                               | $\text{C}_2\text{H}_6 + \text{CH}_3\cdot \rightleftharpoons \text{C}_2\text{H}_5\cdot + \text{CH}_4$                      |
| $\text{CH}_4 + \text{O}\cdot \rightleftharpoons \text{CH}_3\cdot + \text{OH}\cdot$                           | $\text{C}_2\text{H}_5\cdot + \text{M} \rightleftharpoons \text{C}_2\text{H}_4 + \text{H}\cdot + \text{M}$                 |
| $\text{CH}_4 + \text{OH}\cdot \rightleftharpoons \text{CH}_3\cdot + \text{H}_2\text{O}$                      | $\text{C}_2\text{H}_5\cdot + \text{O}_2 \rightleftharpoons \text{C}_2\text{H}_4 + \text{HO}_2\cdot$                       |
| $\text{CH}_4 + \text{HO}_2\cdot \rightleftharpoons \text{CH}_3\cdot + \text{H}_2\text{O}_2$                  | $\text{C}_2\text{H}_4 + \text{O}_2 \rightleftharpoons \text{C}_2\text{H}_3\cdot + \text{HO}_2\cdot$                       |
| <b>CH<sub>3</sub>• oxidation</b>                                                                             | $\text{C}_2\text{H}_4 + \text{H}\cdot \rightleftharpoons \text{C}_2\text{H}_3\cdot + \text{H}_2$                          |
| $\text{CH}_3\cdot + \text{O}_2 \rightleftharpoons \text{CH}_3\text{O}\cdot + \text{O}\cdot$                  | $\text{C}_2\text{H}_4 + \text{OH}\cdot \rightleftharpoons \text{C}_2\text{H}_3\cdot + \text{H}_2\text{O}$                 |
| $\text{CH}_3\cdot + \text{O}_2 \rightleftharpoons \text{CH}_2\text{O} + \text{OH}\cdot$                      | $\text{C}_2\text{H}_4 + \text{CH}_3\cdot \rightleftharpoons \text{C}_2\text{H}_3\cdot + \text{CH}_4$                      |
| $\text{CH}_3\cdot + \text{HO}_2\cdot \rightleftharpoons \text{CH}_3\text{O}\cdot + \text{OH}\cdot$           | $\text{C}_2\text{H}_3\cdot + \text{M} \rightleftharpoons \text{C}_2\text{H}_2 + \text{H}\cdot + \text{M}$                 |
| <b>Coupling Reactions</b>                                                                                    | $\text{C}_2\text{H}_3\cdot + \text{O}_2 \rightleftharpoons \text{C}_2\text{H}_2 + \text{HO}_2\cdot$                       |
| $\text{CH}_3\cdot + \text{CH}_3\cdot + \text{M} \rightleftharpoons \text{C}_2\text{H}_6 + \text{M}$          | $\text{C}_3\text{H}_8 + \text{H}\cdot \rightleftharpoons \text{C}_3\text{H}_7\cdot + \text{H}_2$                          |
| $\text{C}_2\text{H}_5\cdot + \text{CH}_3\cdot + \text{M} \rightleftharpoons \text{C}_3\text{H}_8 + \text{M}$ | $\text{C}_3\text{H}_7\cdot + \text{M} \rightleftharpoons \text{C}_3\text{H}_6 + \text{H}\cdot + \text{M}$                 |
| $\text{C}_2\text{H}_4 + \text{CH}_3\cdot + \text{M} \rightleftharpoons \text{C}_3\text{H}_7\cdot + \text{M}$ | $\text{C}_2\text{H}_6 \rightleftharpoons \text{C}_2\text{H}_5\cdot + \text{H}\cdot$                                       |
| <b>Oxidation of CH<sub>3</sub>O• and CH<sub>2</sub>O</b>                                                     | <b>C<sub>2</sub> Oxidation</b>                                                                                            |
| $\text{CH}_3\text{O}\cdot + \text{M} \rightleftharpoons \text{CH}_2\text{O} + \text{H}\cdot + \text{M}$      | $\text{C}_2\text{H}_3\cdot + \text{HO}_2\cdot \rightleftharpoons \text{CH}_3\cdot + \text{CH}_2\text{O} + \text{OH}\cdot$ |
| $\text{CH}_2\text{O} + \text{OH}\cdot \rightleftharpoons \text{CHO}\cdot + \text{H}_2\text{O}$               | $\text{C}_2\text{H}_4 + \text{OH}\cdot \rightleftharpoons \text{CH}_3\cdot + \text{CH}_2\text{O}$                         |
| $\text{CH}_2\text{O} + \text{HO}_2\cdot \rightleftharpoons \text{CHO}\cdot + \text{H}_2\text{O}_2$           | $\text{C}_2\text{H}_3\cdot + \text{O}_2 \rightleftharpoons \text{CH}_2\text{O} + \text{CHO}\cdot$                         |
| $\text{CH}_2\text{O} + \text{CH}_3\cdot \rightleftharpoons \text{CHO}\cdot + \text{CH}_4$                    | <b>Hydrogen–oxygen reactions</b>                                                                                          |
| $\text{CHO}\cdot + \text{M} \rightleftharpoons \text{CO} + \text{H}\cdot + \text{M}$                         | $\text{O}_2 + \text{H}\cdot \rightleftharpoons \text{OH}\cdot + \text{O}\cdot$                                            |
| $\text{CHO}\cdot + \text{O}_2 \rightleftharpoons \text{CO} + \text{HO}_2\cdot$                               | $\text{O}_2 + \text{H}\cdot + \text{M} \rightleftharpoons \text{HO}_2\cdot + \text{M}$                                    |
| $\text{CO} + \text{HO}_2\cdot \rightleftharpoons \text{CO}_2 + \text{OH}\cdot$                               | $\text{HO}_2\cdot + \text{HO}_2\cdot \rightleftharpoons \text{O}_2 + \text{H}_2\text{O}_2$                                |
|                                                                                                              | $\text{H}_2\text{O}_2 + \text{M} \rightleftharpoons \text{OH}\cdot + \text{OH}\cdot + \text{M}$                           |

Table S2: Catalytic reaction network; Surface reactions<sup>2</sup> grouped by their function in terms of the desired product: positive catalytic function (leading to methane activation and C<sub>2+</sub> products formation) in red, negative catalytic function (leading to CO<sub>x</sub> products formation) in blue.

|                                                                                                |                                                                                                               |
|------------------------------------------------------------------------------------------------|---------------------------------------------------------------------------------------------------------------|
| <b>Oxygen activation</b>                                                                       | $\text{CHO}^* + \text{O}^* \rightleftharpoons \text{CO}^* + \text{OH}^*$                                      |
| $\text{O}_2 + 2^* \rightleftharpoons 2\text{O}^*$                                              | $\text{CO}^* + \text{O}^* \rightleftharpoons \text{CO}_2^* + ^*$                                              |
| <b>Radical generation</b>                                                                      | $\text{CO} + ^* \rightleftharpoons \text{CO}^*$                                                               |
| $\text{CH}_4 + \text{O}^* \rightleftharpoons \text{CH}_3\cdot + \text{OH}^*$                   | $\text{C}_2\text{H}_4 + \text{O}^* \rightleftharpoons \text{C}_2\text{H}_4\text{O}^*$                         |
| $\text{C}_2\text{H}_6 + \text{O}^* \rightleftharpoons \text{C}_2\text{H}_5\cdot + \text{OH}^*$ | $\text{C}_2\text{H}_4\text{O}^* + \text{O}^* \rightleftharpoons \text{C}_2\text{H}_3\text{O}^* + \text{OH}^*$ |
| <b>Regeneration of active sites</b>                                                            | $\text{C}_2\text{H}_3\text{O}^* + \text{O}^* \rightleftharpoons \text{CH}_2\text{O}^* + \text{HCO}^*$         |
| $2\text{OH}^* \rightleftharpoons \text{H}_2\text{O}^* + \text{O}^*$                            | $\text{CH}_3\text{O}\cdot + \text{O}^* \rightleftharpoons \text{CH}_2\text{O} + \text{OH}^*$                  |
| $\text{H}_2\text{O}^* \rightleftharpoons \text{H}_2\text{O} + ^*$                              | $\text{CH}_2\text{O} + \text{O}^* \rightleftharpoons \text{CHO}\cdot + \text{OH}^*$                           |
| <b>Dehydrogenation to ethylene</b>                                                             | $\text{CHO}\cdot + \text{O}^* \rightleftharpoons \text{CO} + \text{OH}^*$                                     |
| $\text{C}_2\text{H}_5\cdot + \text{O}^* \rightleftharpoons \text{C}_2\text{H}_4 + \text{OH}^*$ | <b>Coverage of active site</b>                                                                                |
| <b>Radical quenching</b>                                                                       | $\text{CO}_2 + ^* \rightleftharpoons \text{CO}_2^*$                                                           |
| $\text{HO}_2\cdot + \text{O}^* \rightleftharpoons \text{O}_2 + \text{OH}^*$                    | <b>Generation of HO<sub>2</sub> radical</b>                                                                   |
| $\text{HO}_2\cdot + ^* \rightleftharpoons \text{OH}\cdot + \text{O}^*$                         | $\text{H}_2\text{O}_2 + \text{O}^* \rightleftharpoons \text{HO}_2\cdot + \text{OH}^*$                         |
| <b>Non-selective oxidation</b>                                                                 | <b>Consumption of active O*</b>                                                                               |
| $\text{C}_2\text{H}_4 + \text{O}^* \rightleftharpoons \text{C}_2\text{H}_3\cdot + \text{OH}^*$ | $\text{H}_2 + \text{O}^* \rightleftharpoons \text{H}\cdot + \text{OH}^*$                                      |
| $\text{CH}_3\cdot + \text{O}^* \rightleftharpoons \text{CH}_3\text{O}^*$                       | $\text{OH}\cdot + \text{O}^* \rightleftharpoons \text{O}\cdot + \text{OH}^*$                                  |
| $\text{CH}_3\text{O}^* + \text{O}^* \rightleftharpoons \text{CH}_2\text{O}^* + \text{OH}^*$    | $\text{H}_2\text{O} + \text{O}^* \rightleftharpoons \text{OH}\cdot + \text{OH}^*$                             |
| $\text{CH}_2\text{O}^* + \text{O}^* \rightleftharpoons \text{CHO}^* + \text{OH}^*$             |                                                                                                               |

Table S3: Catalyst descriptors in the OCM fundamental kinetic model, together with the relevant feasibility ranges and the corresponding references for those ranges.

| OCM catalyst descriptor | Lower | Upper | Units | References |
|-------------------------|-------|-------|-------|------------|
|-------------------------|-------|-------|-------|------------|

|                 |                                                              | bound             | bound            |                     |       |
|-----------------|--------------------------------------------------------------|-------------------|------------------|---------------------|-------|
| D <sub>1</sub>  | Reaction enthalpy of H-atom abstraction from CH <sub>4</sub> | 10                | 140              | kJ/mol              | 3, 4  |
| D <sub>2</sub>  | Chemisorption enthalpy of O <sub>2</sub>                     | 30                | 300              | kJ/mol              | 5     |
| D <sub>3</sub>  | Chemisorption enthalpy of CH <sub>2</sub> O                  | 50                | 150              | kJ/mol              | 3, 4  |
| D <sub>4</sub>  | Chemisorption enthalpy of CHO·                               | 100               | 300              | kJ/mol              | 3, 4  |
| D <sub>5</sub>  | Chemisorption enthalpy of CO                                 | 50                | 200              | kJ/mol              | 6, 7  |
| D <sub>6</sub>  | Chemisorption enthalpy of CO <sub>2</sub>                    | 50                | 200              | kJ/mol              | 8-11  |
| D <sub>7</sub>  | Chemisorption enthalpy of H <sub>2</sub> O                   | 20                | 150              | kJ/mol              | 12    |
| D <sub>8</sub>  | Chemisorption enthalpy of C <sub>2</sub> H <sub>4</sub> O    | 20                | 100              | kJ/mol              | 3, 4  |
| D <sub>9</sub>  | Chemisorption enthalpy of C <sub>2</sub> H <sub>3</sub> O·   | 20                | 200              | kJ/mol              | 3, 4  |
| D <sub>10</sub> | Sticking coefficient of O <sub>2</sub>                       | 10 <sup>-3</sup>  | 1                | -                   | 3, 4  |
| D <sub>11</sub> | Sticking coefficient of CH <sub>3</sub> ·                    | 10 <sup>-8</sup>  | 10 <sup>-2</sup> | -                   | 13    |
| D <sub>12</sub> | Sticking coefficient of CO                                   | 10 <sup>-7</sup>  | 10 <sup>-2</sup> | -                   | 3, 4  |
| D <sub>13</sub> | Sticking coefficient of CO <sub>2</sub>                      | 10 <sup>-5</sup>  | 10 <sup>-1</sup> | -                   | 3, 4  |
| D <sub>14</sub> | Sticking coefficient of H <sub>2</sub> O                     | 10 <sup>-5</sup>  | 10 <sup>-1</sup> | -                   | 3, 4  |
| D <sub>15</sub> | Sticking coefficient of C <sub>2</sub> H <sub>4</sub>        | 10 <sup>-8</sup>  | 10 <sup>-3</sup> | -                   | 3, 4  |
| D <sub>16</sub> | Density of active sites                                      | 10 <sup>-11</sup> | 10 <sup>-8</sup> | mol/cm <sup>2</sup> | 14-16 |

Table S4: Catalyst descriptors in the OCM microkinetic model.

| Descriptor | Unit                  | Definition                                                                                                                                                                                                                                                                                                           | Impact in the kinetic model                                                                                                                                                                                        |
|------------|-----------------------|----------------------------------------------------------------------------------------------------------------------------------------------------------------------------------------------------------------------------------------------------------------------------------------------------------------------|--------------------------------------------------------------------------------------------------------------------------------------------------------------------------------------------------------------------|
| D1         | kJ/mol <sub>CH4</sub> | Reaction enthalpy of H-atom abstraction of CH <sub>4</sub> that represents the methane activation occurring through the breaking of a C–H bond assisted by an adsorbed oxygen species, O*, and leading to a methyl radical <sup>17</sup>                                                                             | Key parameter in the calculation of the activation energies of all the H-atom abstraction reactions via Eley-Rideal mechanism                                                                                      |
| D2 - D9    | kJ/mol <sub>i</sub>   | Chemisorption enthalpies of O <sub>2</sub> , CH <sub>2</sub> O, CHO·, CO, CO <sub>2</sub> , H <sub>2</sub> O, C <sub>2</sub> H <sub>4</sub> O, C <sub>2</sub> H <sub>3</sub> O·, which are adsorbed from the gas phase onto the catalyst surface                                                                     | Used, together with the standard enthalpy of formation of the corresponding gas species, to calculate the standard enthalpy of formation of surface species via thermodynamic consistency within a catalytic cycle |
| D10 - D15  | -                     | Sticking probabilities of O <sub>2</sub> , CH <sub>3</sub> ·, CO, CO <sub>2</sub> , H <sub>2</sub> O, C <sub>2</sub> H <sub>4</sub> , representing the ratio of the number of the respective molecules or radicals actually adsorbing on a clean surface to the total number of them colliding with it <sup>18</sup> | Used to correct the maximum value of the pre-exponential factors, calculated via collision theory, of the adsorption steps, which are assumed non-activated                                                        |
| D16        | mol/m <sup>2</sup>    | Density of active sites                                                                                                                                                                                                                                                                                              | Crucial parameter in calculating the reaction rates of the catalytic steps and, hence, affecting the methane conversion and C <sub>2</sub> selectivity in OCM in a significant way                                 |

Kinetic details on the descriptors which were found to be significant in the OCM application of the present methodology:

- D11 is the sticking coefficient of methyl radicals on the active site, i.e. the multiplier of the pre-exponential factor of the following reaction:

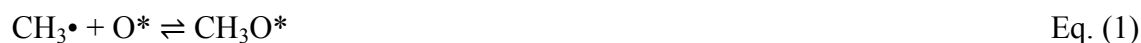

D11 has a crucial kinetic role in steering the selectivity of the OCM reaction. In fact, a high sticking coefficient of methyl radicals (D11) favours  $\text{CH}_3\cdot$  oxidation on the catalyst surface<sup>19</sup> (Eq. (1)) instead of  $\text{CH}_3\cdot$  coupling in the gas phase:

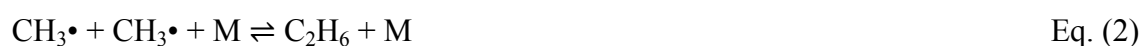

(where M represents a third body).

- D1 is the enthalpy of the reaction of atomic hydrogen abstraction from  $\text{CH}_4$  (kJ):

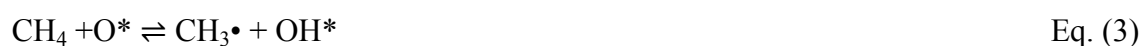

Obviously, low values of D1 favour methane activation<sup>19</sup>.

- D16 is the density of active sites  $^*$  ( $\text{mol}/\text{m}^2$ ), which generate activated oxygen species on the catalyst surface:

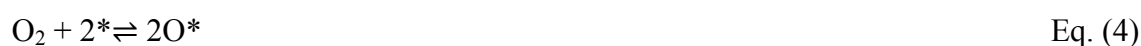

This species is responsible for the desired methane activation (Eq. (3)) but also for undesired deep oxidation surface reactions, indicated by e.g. Eq. (1).

- D2 is the chemisorption enthalpy of  $\text{O}_2$  (enthalpy of the reaction in Eq. (4)). In combination with D1, it determines the stability of the hydroxyl species on the catalyst surface. The latter affects significantly the methane activation and the  $\text{C}_2$  selectivity, mainly via the formation of adsorbed atomic oxygen<sup>20</sup>:

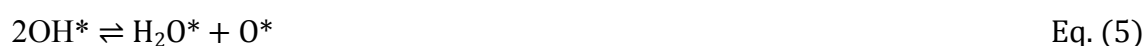

- D15 is sticking coefficient of ethylene on the catalyst surface, which is the multiplier of the pre-exponential factor of the following reaction:

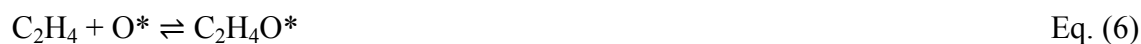

A low value of D15 is, hence, desirable to avoid consecutive oxidation reactions and maximize the yield of the desired, intermediate product: C<sub>2</sub>H<sub>4</sub>.

## **S2. Discovery library of *virtual* OCM catalysts**

In *Step 1* of the methodology, the Fast Flexible Filling (FFF)<sup>21</sup> DoE technique was applied.

This methodology is based on hierarchical clustering<sup>22</sup>: a large number of random points ( $N \gg n$ ) is generated and grouped into clusters using the Fast Ward algorithm<sup>23</sup>, with  $n$  representing the desired number of design points (in the present work, the number of *virtual* catalysts in each library to be designed). Ward's minimum variance criterion tends to produce clusters with approximately the same number of observations, which is ideal for the design of numerical experiments. The centroid of each cluster is taken as a design point, and each design point is treated as being the representative of a region in the design space. Therefore, FFF designs satisfy the *minimax* criterion<sup>24</sup>, which aims at minimizing the maximum distance between non-design points in the design space and their nearest design point. This is opposed to the *maximin* criterion<sup>24</sup>, implemented in other space-filling design techniques such as sphere packing<sup>25</sup>, which seeks to maximize the minimum distance between any pair of design points.

The design of experiments was implemented via the statistical software JMP<sup>®</sup> 13.2.1<sup>26</sup>.

FFF was applied to sample *virtual* catalysts in the [0,1]<sup>16</sup> descriptors' space. Subsequently, a linear transformation was used to relate the [0,1] range to the selected value ranges for each descriptor reported in Table S3.

For descriptors 10 to 16, which have variability ranges spanning more than three order of magnitudes, the logarithm was considered, in order to reduce the skewness of the distributions.

A 2D visualization of the obtained 16-dimensional library is shown in Figure S1 below.

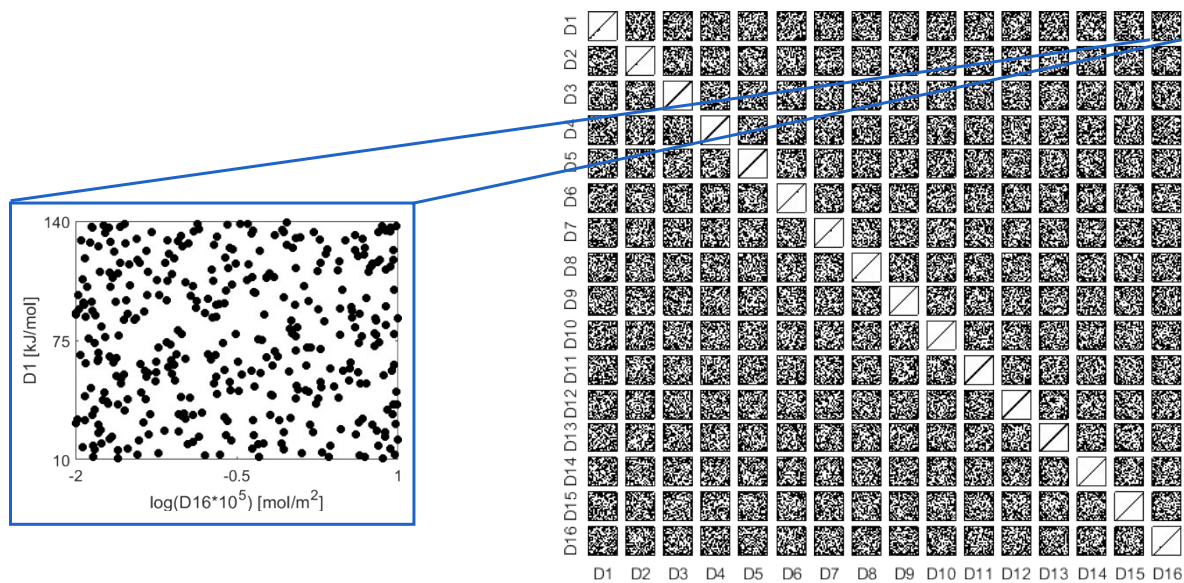

Figure S1. Scatterplot matrix representation of the 16-dimensional discovery library of virtual catalysts obtained in step 1 of the proposed methodology for the OCM application. Each of the 320 points in each square, such as the one in the zoom framed in blue, represents a virtual catalyst.

### S3. Additional information about dataset 1

Table S5: Composition of the catalysts in the dataset of Kondratenko et al.<sup>27</sup> and experimentally determined performance.

| Group                               | Catalysts | Composition [wt%] |      |     |     |     |     |     |     | Performance [-] |           |           |
|-------------------------------------|-----------|-------------------|------|-----|-----|-----|-----|-----|-----|-----------------|-----------|-----------|
|                                     |           | La                | Mg   | Sr  | Ba  | Li  | Na  | Cs  | Mn  | $X_{CH_4}$      | $S_{C_2}$ | $Y_{C_2}$ |
| Pure La <sub>2</sub> O <sub>3</sub> | La        | 100               |      |     |     |     |     |     |     | 0.39            | 0.35      | 0.14      |
|                                     | LaSrMn    | 90.8              |      | 9.1 |     |     |     |     | 0.1 | 0.38            | 0.37      | 0.14      |
|                                     | LaSrBa    | 90.8              |      | 9.1 | 0.1 |     |     |     |     | 0.39            | 0.42      | 0.16      |
|                                     | LaSrLi    | 90.8              |      | 9.1 |     | 0.1 |     |     |     | 0.41            | 0.42      | 0.17      |
|                                     | LaSrNa    | 90.8              |      | 9.1 |     |     | 0.1 |     |     | 0.39            | 0.41      | 0.16      |
| La-Sr                               | LaSrCs    | 90.8              |      | 9.1 |     |     |     | 0.1 |     | 0.39            | 0.38      | 0.15      |
|                                     | LaBaMn    | 98.9              |      |     | 1.0 |     |     |     | 0.1 | 0.39            | 0.30      | 0.12      |
|                                     | LaBaLi    | 99.8              |      |     | 0.1 | 0.1 |     |     |     | 0.39            | 0.40      | 0.15      |
|                                     | LaBaNa    | 90.8              |      |     | 0.1 |     | 9.1 |     |     | 0.35            | 0.40      | 0.14      |
|                                     | LaBaCs    | 99.8              |      |     | 0.1 |     |     | 0.1 |     | 0.38            | 0.39      | 0.15      |
| La-Mg                               | LaMgMn    | 90.8              | 9.1  |     |     |     |     |     | 0.1 | 0.35            | 0.29      | 0.10      |
|                                     | LaMgSr    | 83.8              | 8.3  | 8.3 |     |     |     |     |     | 0.39            | 0.38      | 0.15      |
|                                     | LaMgBa    | 90.1              | 9.0  |     | 0.9 |     |     |     |     | 0.40            | 0.40      | 0.16      |
|                                     | LaMgLi    | 90.8              | 9.1  |     |     | 0.1 |     |     |     | 0.39            | 0.36      | 0.14      |
|                                     | LaMgNa    | 90.8              | 9.1  |     |     |     | 0.1 |     |     | 0.39            | 0.36      | 0.14      |
|                                     | LaMgCs    | 90.1              | 9.0  |     |     |     |     | 0.9 |     | 0.38            | 0.34      | 0.13      |
| La-Alkali                           | LaLiMn    | 83.3              |      |     |     | 8.3 |     |     | 8.3 | 0.35            | 0.31      | 0.11      |
|                                     | LaNaMn    | 90.1              |      |     |     |     |     | 9.0 | 0.9 | 0.38            | 0.37      | 0.14      |
|                                     | LaCsMn    | 83.3              |      |     |     |     |     | 8.3 | 8.3 | 0.34            | 0.26      | 0.09      |
|                                     | LaNaLi    | 83.3              |      |     |     | 8.3 | 8.3 |     |     | 0.38            | 0.34      | 0.13      |
|                                     | LaNaCs    | 90.8              |      |     |     |     | 9.1 | 0.1 |     | 0.39            | 0.37      | 0.15      |
|                                     | LaCsLi    | 90.8              |      |     |     | 9.1 |     | 0.1 |     | 0.40            | 0.37      | 0.15      |
| Pure MgO                            | Mg        |                   | 100  |     |     |     |     |     |     | 0.36            | 0.28      | 0.10      |
|                                     | MgSrMn    |                   | 83.3 | 8.3 |     |     |     |     | 8.3 | 0.25            | 0.04      | 0.01      |
|                                     | MgSrBa    |                   | 83.3 | 8.3 | 8.3 |     |     |     |     | 0.40            | 0.42      | 0.17      |
|                                     | MgSrLi    |                   | 83.3 | 8.3 |     | 8.3 |     |     |     | 0.28            | 0.37      | 0.10      |
|                                     | MgSrNa    |                   | 83.3 | 8.3 |     |     | 8.3 |     |     | 0.39            | 0.40      | 0.16      |
| Mg-Sr                               | MgSrCs    |                   | 83.3 | 8.3 |     |     |     | 8.3 |     | 0.41            | 0.41      | 0.17      |
|                                     | MgBaMn    | 90.8              |      |     | 9.1 |     |     |     | 0.1 | 0.35            | 0.34      | 0.12      |
|                                     | MgBaLi    | 90.8              |      |     | 0.1 | 9.1 |     |     |     | 0.09            | 0.71      | 0.06      |
|                                     | MgBaNa    | 90.1              |      |     | 0.9 |     | 9.0 |     |     | 0.03            | 0.53      | 0.02      |
|                                     | MgBaCs    | 83.3              |      |     | 8.3 |     |     | 8.3 |     | 0.39            | 0.39      | 0.15      |
| Mg-La                               | MgLaMn    | 9.1               | 90.8 |     |     |     |     |     | 0.1 | 0.34            | 0.26      | 0.09      |
|                                     | MgLaSr    | 8.3               | 83.3 | 8.3 |     |     |     |     |     | 0.38            | 0.37      | 0.14      |
|                                     | MgLaBa    | 9.0               | 90.1 |     | 0.9 |     |     |     |     | 0.37            | 0.34      | 0.13      |
|                                     | MgLaLi    | 8.3               | 83.3 |     |     | 8.3 |     |     |     | 0.37            | 0.28      | 0.10      |
|                                     | MgLaNa    | 8.3               | 83.3 |     |     |     | 8.3 |     |     | 0.41            | 0.39      | 0.16      |
|                                     | MgLaCs    | 8.3               | 83.3 |     |     |     |     | 8.3 |     | 0.37            | 0.32      | 0.12      |
| Mg-Alkali                           | MgLiMn    |                   | 90.8 |     |     | 9.1 |     |     | 0.1 | 0.17            | 0.57      | 0.10      |
|                                     | MgNaMn    |                   | 90.8 |     |     |     |     | 9.1 | 0.1 | 0.33            | 0.03      | 0.01      |
|                                     | MgCsMn    |                   | 90.8 |     |     |     |     | 9.1 | 0.1 | 0.33            | 0.28      | 0.09      |
|                                     | MgNaLi    |                   | 90.8 |     |     | 9.1 | 0.1 |     |     | 0.09            | 0.70      | 0.06      |
|                                     | MgNaCs    |                   | 90.8 |     |     |     | 0.1 | 9.1 |     | 0.37            | 0.30      | 0.11      |
|                                     | MgCsLi    |                   | 90.8 |     |     | 9.1 |     | 0.1 |     | 0.11            | 0.69      | 0.07      |

Table S6: Process data concerning the dataset of Kondratenko et al.<sup>27</sup>.

| Variable                                                          | Experimental | Simulation            |
|-------------------------------------------------------------------|--------------|-----------------------|
| Reactor Type                                                      |              | Isothermal Fixed-Bed  |
| Operating Temperature (K)                                         |              | 1073                  |
| Operating Pressure (bar)                                          |              | 1                     |
| Feed Gas                                                          |              | CH <sub>4</sub> + Air |
| CH <sub>4</sub> /O <sub>2</sub> (mol/mol)                         |              | 2                     |
| Space Time (kg <sub>cat</sub> s/mol <sub>CH<sub>4,0</sub></sub> ) |              | 71                    |
| Catalyst/Diluent (SiC)                                            |              | 1:3                   |
| Catalyst Particles Diameter (μm)                                  | 250-450      | 350                   |



Table S7: Results of the Kruskal-Wallis test applied to the descriptors distributions in the four clusters obtained from the discovery library for the dataset of Kondratenko et al.<sup>27</sup>. A  $p$  value  $< 0.05$  has been considered as threshold for significance: the null hypothesis of equal mean ranks among the distributions of the descriptor in different clusters can be rejected. The strength of the effect is defined according to the growing order of the  $H$ -statistics obtained during the test<sup>28</sup>. In red, the descriptors which have been considered significant for the targeting procedure.

| Descriptor | p-value           | Strength of the effect |
|------------|-------------------|------------------------|
| <b>D11</b> | <b>&lt;0.0001</b> | <b>115.9</b>           |
| <b>D1</b>  | <b>&lt;0.0001</b> | <b>54.7</b>            |
| <b>D16</b> | <b>&lt;0.0001</b> | <b>26.2</b>            |
| <b>D15</b> | <b>&lt;0.0001</b> | <b>22.9</b>            |
| D7         | 0.10              | 6.3                    |
| D8         | 0.34              | 3.3                    |
| D14        | 0.36              | 3.2                    |
| D6         | 0.44              | 2.7                    |
| D9         | 0.44              | 2.7                    |
| D10        | 0.52              | 2.3                    |
| D2         | 0.62              | 1.8                    |
| D3         | 0.68              | 1.5                    |
| D13        | 0.82              | 0.9                    |
| D5         | 0.88              | 0.7                    |
| D4         | 0.91              | 0.6                    |
| D12        | 0.92              | 0.5                    |

Table S8: Results of the Mood's median test applied to the descriptors distributions in the four clusters obtained from the discovery library for the dataset of Kondratenko et al.<sup>27</sup>. A  $p$  value  $< 0.05$  has been considered as threshold for significance: the null hypothesis of equal medians among the distributions of the descriptor in different clusters can be rejected. The strength of the effect is defined according to the growing order of the  $H$ -statistics obtained during the test<sup>29</sup>. The results are in good agreement with the ones reported in Table S7. In red, the descriptors which have been considered significant for the targeting procedure.

| Descriptor | p-value           | Strength of the effect |
|------------|-------------------|------------------------|
| <b>D11</b> | <b>&lt;0.0001</b> | <b>106.06</b>          |
| <b>D1</b>  | <b>&lt;0.0001</b> | <b>46.0</b>            |
| <b>D15</b> | <b>&lt;0.0001</b> | <b>21.5</b>            |
| <b>D16</b> | <b>0.0005</b>     | <b>17.9</b>            |
| D13        | 0.31              | 3.6                    |
| D6         | 0.34              | 3.3                    |
| D9         | 0.41              | 2.9                    |
| D12        | 0.43              | 2.8                    |
| D10        | 0.52              | 2.3                    |
| D2         | 0.60              | 1.9                    |
| D7         | 0.64              | 1.7                    |
| D14        | 0.64              | 1.7                    |
| D5         | 0.65              | 1.6                    |
| D3         | 0.67              | 1.5                    |
| D8         | 0.77              | 1.1                    |
| D4         | 0.95              | 0.4                    |

## S4. Additional information about dataset 2

Table S9. Characterization of the dataset of Kuš et al.<sup>30</sup> and experimentally determined performance for four different catalysts. The calcination atmosphere used in the catalyst synthesis has been altered for some catalysts. Surface basicity has been measured via temperature-programmed desorption of CO<sub>2</sub> and is reported as total μmol CO<sub>2</sub> desorbed per m<sup>2</sup> of catalyst surface area.

| Oxide                          | Calcination        | Basicity<br>[μmol m <sup>-2</sup> ] | X <sub>CH<sub>4</sub></sub> [-] | S <sub>C<sub>2</sub></sub> [-] | Y <sub>C<sub>2</sub></sub> [-] |
|--------------------------------|--------------------|-------------------------------------|---------------------------------|--------------------------------|--------------------------------|
| La <sub>2</sub> O <sub>3</sub> | O <sub>2</sub> (a) | 39.3                                | 0.40                            | 0.33                           | 0.13                           |
|                                | He (b)             | 37.8                                | 0.36                            | 0.33                           | 0.12                           |
| Nd <sub>2</sub> O <sub>3</sub> | O <sub>2</sub> (a) | 17.2                                | 0.38                            | 0.31                           | 0.12                           |
|                                | He (b)             | 19.0                                | 0.36                            | 0.30                           | 0.11                           |
| ZrO <sub>2</sub>               | Air (a)            | 0.5                                 | 0.16                            | 0.27                           | 0.04                           |
|                                | He (b)             | 0.4                                 | 0.12                            | 0.23                           | 0.03                           |
| Nb <sub>2</sub> O <sub>5</sub> | Air                | 0.2                                 | 0.06                            | 0.19                           | 0.01                           |

Table S10: Process data concerning the dataset of Kuš et al.<sup>30</sup>.

| Variable                                                          | Experimental          | Simulation |
|-------------------------------------------------------------------|-----------------------|------------|
| Reactor Type                                                      | Isothermal Fixed-Bed  |            |
| Operating Temperature (K)                                         | 1033                  |            |
| Operating Pressure (bar)                                          | 1                     |            |
| Feed Gas                                                          | CH <sub>4</sub> + Air |            |
| CH <sub>4</sub> /O <sub>2</sub> (mol/mol)                         | 2                     |            |
| Space Time (kg <sub>cat</sub> s/mol <sub>CH<sub>4,0</sub></sub> ) | 1031                  |            |
| Catalyst Particles Diameter (μm)                                  | 300-600               | 450        |

Table S11: Description of the clusters obtained in the performance-based comparison via k-means clustering applied to the dataset of Kuš et al.<sup>30</sup>.

| Cluster | Colour | Number<br><i>virtual</i><br>catalysts | Number<br><i>real</i><br>catalysts | X <sub>CH<sub>4</sub></sub> [%]<br>(mean and<br>standard<br>deviation) | S <sub>C<sub>2</sub></sub> [%]<br>(mean and<br>standard<br>deviation) | C <sub>2</sub> Yield [%]<br>(mean and<br>standard<br>deviation) |
|---------|--------|---------------------------------------|------------------------------------|------------------------------------------------------------------------|-----------------------------------------------------------------------|-----------------------------------------------------------------|
| C1      | Red    | 37                                    | 0                                  | 8.9 ± 7.1                                                              | 50.2 ± 13.3                                                           | 4.6 ± 4.4                                                       |
| C2      | Blue   | 67                                    | 0                                  | 55.5 ± 7.5                                                             | 67.6 ± 7.5                                                            | 37.9 ± 9.0                                                      |
| C3      | Green  | 80                                    | 4                                  | 37.9 ± 6.3                                                             | 37.1 ± 9.7                                                            | 14.4 ± 5.2                                                      |
| C4      | Yellow | 136                                   | 3                                  | 22.9 ± 7.6                                                             | 6.2 ± 8.2                                                             | 1.4 ± 2.0                                                       |

Table S12: Results of the Mann-Whitney test applied to the descriptors distributions in the four clusters obtained from the discovery library for the dataset of Kuš et al.<sup>30</sup>. A  $p$  value  $< 0.05$  has been considered as threshold for significance: the null hypothesis of equal mean ranks among the distributions of the descriptor in different clusters can be rejected. The strength of the effect is defined according to the growing order of the  $\chi^2$  statistics obtained during the test<sup>28</sup>. In red, the descriptors which have been considered significant for the targeting procedure.

| Descriptor | p-value       | Strength of the effect |
|------------|---------------|------------------------|
| <b>D1</b>  | <b>0.0002</b> | <b>14.3</b>            |
| <b>D2</b>  | <b>0.0031</b> | <b>8.7</b>             |
| D15        | 0.08          | 3.1                    |
| D13        | 0.12          | 2.4                    |
| D4         | 0.23          | 1.5                    |
| D3         | 0.23          | 1.5                    |
| D9         | 0.31          | 1.0                    |
| D12        | 0.53          | 0.40                   |
| D11        | 0.59          | 0.29                   |
| D16        | 0.59          | 0.29                   |
| D14        | 0.63          | 0.23                   |
| D7         | 0.78          | 0.08                   |
| D6         | 0.85          | 0.04                   |
| D8         | 0.85          | 0.04                   |
| D10        | 0.90          | 0.02                   |
| D5         | 0.90          | 0.02                   |

Table S13: Results of the Mood's median test applied to the descriptors distributions in the four clusters obtained from the discovery library for the dataset of Kuš et al.<sup>30</sup>. A  $p$  value  $< 0.05$  has been considered as threshold for significance: the null hypothesis of equal medians among the distributions of the descriptor in different clusters can be rejected. The strength of the effect is defined according to the growing order of the  $\chi^2$  statistics obtained during the test<sup>29</sup>. The results are in good agreement with the ones reported in Table S11. In red, the descriptors which have been considered significant for the targeting procedure.

| Descriptor | p-value       | Strength of the effect |
|------------|---------------|------------------------|
| <b>D1</b>  | <b>0.0021</b> | <b>9.5</b>             |
| <b>D2</b>  | <b>0.0279</b> | <b>4.8</b>             |
| D14        | 0.19          | 1.7                    |
| D13        | 0.19          | 1.7                    |
| D4         | 0.19          | 1.7                    |
| D9         | 0.19          | 1.7                    |
| D15        | 0.66          | 0.19                   |
| D12        | 0.66          | 0.19                   |
| D11        | 0.66          | 0.19                   |
| D16        | 0.66          | 0.19                   |
| D3         | 0.66          | 0.19                   |
| D7         | 0.66          | 0.19                   |
| D6         | 0.66          | 0.19                   |
| D8         | 0.66          | 0.19                   |
| D10        | 0.66          | 0.19                   |
| D5         | 0.66          | 0.19                   |

## S5. Additional Information about dataset 3

Table S14. Data of Malekzadeh et al.<sup>31</sup>, experimentally determined performance for  $MO_x/Na_2WO_4/SiO_2$  catalysts and their electrical properties (electrical conductivity, semiconductor type and metal oxide band gap). The catalysts are ordered according to increasing electrical conductivity.

| Catalyst             | $\sigma \times 10^6 [\Omega^{-1}]$ | Semiconductor type | Band gap [eV] | $X_{CH_4}$ [-] | $S_{C_2}$ [-] | $Y_{C_2}$ [-] |
|----------------------|------------------------------------|--------------------|---------------|----------------|---------------|---------------|
| V/ $Na_2WO_4/SiO_2$  | 0.1                                | n                  | 2.1           | 0.10           | 0.12          | 0.01          |
| Zn/ $Na_2WO_4/SiO_2$ | 20                                 | n                  | 3.3           | 0.09           | 0.63          | 0.06          |
| Cr/ $Na_2WO_4/SiO_2$ | 80                                 | n, p               | 1.9           | 0.10           | 0.24          | 0.02          |
| Fe/ $Na_2WO_4/SiO_2$ | 100                                | n                  | 1.0           | 0.15           | 0.60          | 0.09          |
| Co/ $Na_2WO_4/SiO_2$ | 303                                | p                  | 0.9           | 0.16           | 0.68          | 0.11          |
| $Na_2WO_4/SiO_2$     | 333                                | -                  | -             | 0.11           | 0.63          | 0.07          |
| Mn/ $Na_2WO_4/SiO_2$ | 20000                              | p                  | 0.3           | 0.20           | 0.80          | 0.16          |

Table S15: Process data concerning the dataset of Malekzadeh et al.<sup>31</sup>.

| Variable                                 | Experimental         | Simulation    |
|------------------------------------------|----------------------|---------------|
| Reactor Type                             | Isothermal Fixed-Bed |               |
| Operating Temperature (K)                | 1048                 |               |
| Operating Pressure (bar)                 | 1                    |               |
| Feed Gas                                 | $CH_4 + O_2$         |               |
| $CH_4/O_2$ (mol/mol)                     | 7.5                  |               |
| Space Time ( $kg_{cat} s/mol_{CH_4,0}$ ) | 5.2                  |               |
| Catalyst Particles Diameter ( $\mu m$ )  | -                    | 300 (assumed) |

Table S16: Description of the clusters obtained in the performance-based comparison via k-means clustering applied to the dataset of Malekzadeh et al.<sup>31</sup>.

| Cluster | Colour | Number virtual catalysts | Number real catalysts | $X_{CH_4}$ [%] (mean and standard deviation) | $S_{C_2}$ [%] (mean and standard deviation) | $C_2$ Yield [%] (mean and standard deviation) |
|---------|--------|--------------------------|-----------------------|----------------------------------------------|---------------------------------------------|-----------------------------------------------|
| C1      | Red    | 127                      | 0                     | $2.7 \pm 3.0$                                | $93.0 \pm 4.8$                              | $2.5 \pm 2.8$                                 |
| C2      | Blue   | 48                       | 1                     | $22.1 \pm 5.4$                               | $89.7 \pm 6.6$                              | $20.0 \pm 5.6$                                |
| C3      | Green  | 57                       | 4                     | $6.3 \pm 6.0$                                | $57.9 \pm 12.0$                             | $3.8 \pm 3.8$                                 |
| C4      | Yellow | 88                       | 2                     | $3.1 \pm 3.0$                                | $5.3 \pm 8.4$                               | $0.2 \pm 0.5$                                 |

Table S17: Results of the Kruskal-Wallis test applied to the descriptors distributions in the four clusters obtained from the discovery library for the dataset of Malekzadeh et al.<sup>31</sup>. A p value < 0.05 has been considered as threshold for significance: the null hypothesis of equal mean ranks among the distributions of the descriptor in different clusters can be rejected. The strength of the effect is defined according to the growing order of the  $\chi^2$  statistics obtained during the test<sup>28</sup>. In red, the descriptors which have been considered significant for the targeting procedure.

| Descriptor | p-value           | Strength of the effect |
|------------|-------------------|------------------------|
| <b>D11</b> | <b>&lt;0.0001</b> | <b>71.9</b>            |
| <b>D1</b>  | <b>&lt;0.0001</b> | <b>53.0</b>            |
| <b>D16</b> | <b>0.0020</b>     | <b>12.47</b>           |
| <b>D15</b> | <b>0.0072</b>     | <b>9.9</b>             |
| D10        | 0.11              | 4.5                    |
| D4         | 0.23              | 2.9                    |
| D6         | 0.26              | 2.7                    |
| D3         | 0.33              | 2.2                    |
| D13        | 0.35              | 2.1                    |
| D5         | 0.47              | 1.5                    |
| D7         | 0.53              | 1.3                    |
| D8         | 0.53              | 1.3                    |
| D2         | 0.60              | 1.0                    |
| D9         | 0.73              | 0.6                    |
| D14        | 0.76              | 0.5                    |
| D12        | 0.85              | 0.3                    |

Table S18: Results of the Mood's median test applied to the descriptors distributions in the four clusters obtained from the discovery library for the dataset of Malekzadeh et al.<sup>31</sup>. A p value < 0.05 has been considered as threshold for significance: the null hypothesis of equal medians among the distributions of the descriptor in different clusters can be rejected. The strength of the effect is defined according to the growing order of the  $\chi^2$  statistics obtained during the test<sup>29</sup>. The results are in good agreement with the ones reported in Table S15. In red, the descriptors which have been considered significant for the targeting procedure.

| Descriptor | p-value           | Strength of the effect |
|------------|-------------------|------------------------|
| <b>D11</b> | <b>&lt;0.0001</b> | <b>55.2</b>            |
| <b>D1</b>  | <b>&lt;0.0001</b> | <b>38.9</b>            |
| <b>D15</b> | <b>0.0018</b>     | <b>12.6</b>            |
| <b>D16</b> | <b>0.0031</b>     | <b>11.5</b>            |
| D4         | 0.20              | 3.2                    |
| D3         | 0.25              | 2.8                    |
| D10        | 0.31              | 2.3                    |
| D13        | 0.41              | 1.8                    |
| D6         | 0.42              | 1.7                    |
| D14        | 0.53              | 1.3                    |
| D12        | 0.58              | 1.1                    |
| D2         | 0.59              | 1.1                    |
| D7         | 0.64              | 0.9                    |
| D8         | 0.72              | 0.7                    |
| D9         | 0.80              | 0.4                    |
| D5         | 0.92              | 0.2                    |

According to the results above, descriptors 15 and 16 were included in the targeting procedure.

However their impact in discriminating between the three targeted libraries resulted to be

minimal, as show in the figure below, where the box plots for each descriptor show a high overlap and no real trend can be identified.

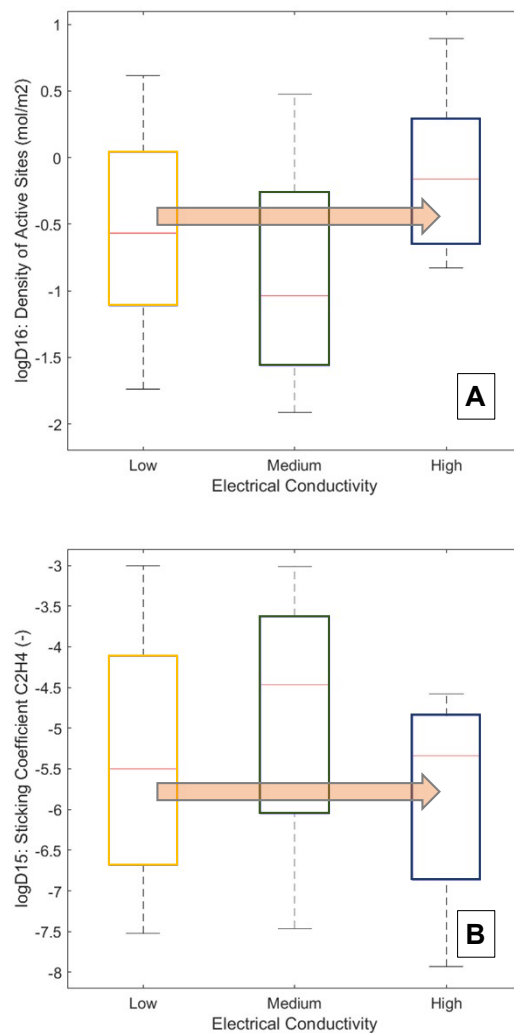

Figure S2. Comparison of the distributions of descriptors  $\log D16$ : density of active sites (A) and  $\log D15$ : sticking coefficient of  $C_2H_4$  (B) in the virtual libraries which have been generated and tested in order to target the performances of real catalysts from the dataset of Malekzadeh et al.<sup>31</sup> with increasing (from C4 to C2) electrical conductivity.

## References

1. Q. Chen, P. M. Couwenberg and G. B. Marin, *Catal. Today*, 1994, **21**, 309-319.
2. P. N. Kechagiopoulos, J. W. Thybaut and G. B. Marin, *Ind. Eng. Chem. Res.*, 2014, **53**, 1825-1840.
3. V. I. Alexiadis, M. Chaar, A. van Veen, M. Muhler, J. W. Thybaut and G. B. Marin, *Appl. Catal. B-Environ.*, 2016, **199**, 252-259.
4. J. W. Thybaut, J. Sun, L. Olivier, A. C. Van Veen, C. Mirodatos and G. B. Marin, *Catal. Today*, 2011, **159**, 29-36.
5. Y. P. Arnaud, *Appl. Surf. Sci.*, 1992, **62**, 37-45.
6. A. Zecchina, D. Scarano, S. Bordiga, G. Spoto and C. Lamberti, in *Advances in Catalysis*, Academic Press, 2001, vol. 46, pp. 265-397.
7. V. E. Ostrovskii, *Thermochim. Acta*, 2009, **489**, 5-21.
8. M. Casarin, D. Falcomer, A. Glisenti and A. Vittadini, *Inorg. Chem.*, 2003, **42**, 436-445.
9. C. Chu, Y. Zhao, S. Li and Y. Sun, *J. Phys. Chem. C*, 2016, **120**, 2737-2746.
10. A. Auroux and A. Gervasini, *J. Phys. Chem. US*, 1990, **94**, 6371-6379.
11. M. Cutrufello, I. Ferino, E. Rombi, V. Solinas, G. Colón and J. Navío, *J. Therm. Anal. Calorim.*, 2003, **72**, 223-229.
12. J. Majzlan, L. Mazeina and A. Navrotsky, *Geochim. Cosmochim. Ac.*, 2007, **71**, 615-623.
13. Y. Tong and J. H. Lunsford, *J. Am. Chem. Soc.*, 1991, **113**, 4741-4746.
14. S. Lacombe, C. Geantet and C. Mirodatos, *J. Catal.*, 1995, **151**, 439-452.
15. D. Wolf, M. Slinko, E. Kurkina and M. Baerns, *Appl. Catal. A-General*, 1998, **166**, 47-54.
16. H. Zanthoff, Z. Zhang, T. Grzybek, L. Lehmann and M. Baerns, *Catal. Today*, 1992, **13**, 469-480.
17. J. H. Lunsford, *Langmuir*, 1989, **5**, 12-16.
18. J. A. Dumesic, D. F. Rudd, L. M. Aparicio, J. E. Rekoske and A. A. Treviño, *ACS Professional Reference Book*, Washington, DC, 1993, 315.
19. J. Sun, J. W. Thybaut and G. B. Marin, *Catal. Today*, 2008, 137, 90-102.
20. V. I. Alexiadis, J. W. Thybaut, P. N. Kechagiopoulos, M. Chaar, A. C. van Veen, M. Muhler and G. B. Marin, *Appl. Catal. B-Environ.*, 2014, 150, 496-505.
21. R. Lekivetz and B. Jones, *Qual. Reliab. Eng. Int.*, 2015, **31**, 829-837.
22. S.C. Johnson, *Psychometrika*, 1967, **32**, 241-254.
23. J.H. Ward, *J. Am. Stat. Assoc.*, 1963, **58**, 236-244.
24. M.E. Johnson, L.M. Moore and D. Ylvisaker, *J. Stat. Plan. Infer.*, 1990, **26**, 131-148.
25. L. Pronzato and W.G. Müller, *Stat. Comput.*, 2012, **22**, 681-701.
26. SAS, JMP 13.2.1, <https://www.jmp.com>.
27. E. V. Kondratenko, M. Schluter, M. Baerns, D. Linke and M. Holena, *Catal. Sci. Technol.*, 2015, **5**, 1668-1677.
28. W. H. Kruskal and W. A. Wallis, *J. Am. Stat. Assoc.*, 1952, **47**, 583-621.
29. A. M. Mood, *Ann. Math. Stat.*, 1954, **25**, 514-522.
30. S. Kuś, M. Otremba and M. Taniewski, *Fuel*, 2003, **82**, 1331-1338.
31. A. Malekzadeh, A. Khodadadi, M. Abedini, M. Amini, A. Bahramian and A. K. Dalai, *Catal. Commun.*, 2001, **2**, 241-247.
